# Supplementary material for: Weighted composite time to event endpoints with recurrent events: comparison of three analytical approaches
Source: PubMed Central journal article supplement (PMC8818231; doi:10.1186/s12874-022-01511-1), 2022-02-05
Supplement: 12874_2022_1511_MOESM1_ESM.pdf [file 12874_2022_1511_MOESM1_ESM.pdf]

## RESEARCH

# Additional file for: 'Weighted Composite Time To Event Endpoints with Recurrent Events: Comparison of Three Analytical Approaches'

Ann-Kathrin Ozga and Geraldine Rauch

Full list of author information is available at the end of the article

## 1 Stratified weight-based log-rank test

The test-statistic for the approach by Rauch et al. (see Section *Approach by Rauch et al.* of main text) is given as follows:

$$T^R = \frac{\sum_{j=1}^J \sum_{k=1}^K \left[ (w_D^R e_{D,jk}^I + w_M^R e_{M,jk}^I) - \frac{n_{jk}^I}{n_{jk}^I + n_{jk}^C} (w_D^R e_{D,jk} + w_M^R e_{M,jk}) \right]}{\sqrt{\sum_{j=1}^J \sum_{k=1}^K \frac{n_{jk}^I n_{jk}^C}{(n_{jk}^I + n_{jk}^C)^2} \left[ (w_D^R)^2 e_{D,jk} + (w_M^R)^2 e_{M,jk} \right] - (w_D^R)^2 e_{D,jk}^2 - (w_M^R)^2 e_{M,jk}^2}}$$

- $j = 1, \dots, J$  are the strata, i.e. all first events (death  $D$  or myocardial infarction  $M$ ) are in the first stratum, all second events (death  $D$  or myocardial infarction  $M$ ) are in the second stratum, and so on.
- $K_j$  are the number of event times in stratum  $j$ , i.e.  $k = 1, \dots, K$  indicate the number of events within a stratum.
- $w_D^R$  and  $w_M^R$  are the weights for death and myocardial infarction, respectively.
- $e_{D,jk}^I$  are the number of death-events in stratum  $j$  at event time point  $t_{jk}$  within the intervention group  $I$ .
- $e_{M,jk}^I$  are the number of myocardial infarction-events in stratum  $j$  at event time point  $t_{jk}$  within the intervention group  $I$ .
- $e_{D,jk}$  are the number of death-events in stratum  $j$  at event time point  $t_{jk}$  (for intervention  $I$  and control  $C$  combined).
- $e_{M,jk}$  are the number of myocardial infarction-events in stratum  $j$  at event time point  $t_{jk}$  (for intervention  $I$  and control  $C$  combined).
- $n_{jk}^I$  are the number of individuals at risk in stratum  $j$  at event time  $t_{jk}$  for the intervention group.
- $n_{jk}^C$  are the number of individuals at risk in stratum  $j$  at event time  $t_{jk}$  for the control group.

## 2 Example Bakal et al.

**Table 1** Example data set to illustrate approach by Bakal et al.

| ID | time | weight |
|----|------|--------|
| 1  | 1    | 0.3    |
| 1  | 2    | 0.3    |
| 1  | 3    | 0.3    |
| 1  | 4    | 1      |
| 2  | 1    | 0.3    |
| 2  | 4    | 1      |
| 3  | 5    | 0.3    |
| 3  | 6    | 0.3    |
| 3  | 7    | 1      |

- First step:
  - Calculate individual score at all (whole dataset) distinct ordered event time points ( $s_i(t_k)$ ) with  $i = 1, \dots, n$ ,  $K_j$  as above,  $s_i(0) = 1$ , and  $t_0 = 0$ :

$$s_i(t_k) = s_i(t_{k-1}) - \left[ s_i(t_{k-1}) \cdot w_i^B(t_k) \right]$$

- **In example:**  $n=3$ ,  $K=7$

### Individual $ID = 1$ :

$$\text{at } t_1 = 1 \text{ the score is: } s_1(1) = s_1(t_0) - [s_1(t_0) \cdot w_1^B(1)] = 1 - (1 \cdot 0.3) = 0.7$$

$$\text{at } t_2 = 2 \text{ the score is: } s_1(2) = s_1(t_1) - [s_1(t_1) \cdot w_1^B(2)] = 0.7 - (0.7 \cdot 0.3) = 0.49$$

$$\text{at } t_3 = 3 \text{ the score is: } s_1(3) = s_1(t_2) - [s_1(t_2) \cdot w_1^B(3)] = 0.49 - (0.49 \cdot 0.3) = 0.343$$

$$\text{at } t_4 = 4 \text{ the score is: } s_1(4) = s_1(t_3) - [s_1(t_3) \cdot w_1^B(4)] = 0.343 - (0.343 \cdot 1) = 0$$

$$\text{at } t_5 = 5 \text{ the score is: } s_1(5) = 0$$

$$\text{at } t_6 = 6 \text{ the score is: } s_1(6) = 0$$

$$\text{at } t_7 = 7 \text{ the score is: } s_1(7) = 0$$

### Individual $ID = 2$ :

$$\text{at } t_1 = 1 \text{ the score is: } s_2(1) = s_2(t_0) - [s_2(t_0) \cdot w_2^B(1)] = 1 - (1 \cdot 0.3) = 0.7$$

$$\text{at } t_2 = 2 \text{ the score is: } s_2(2) = s_2(t_1) - [s_2(t_1) \cdot w_2^B(2)] = 0.7 - (0.7 \cdot 0) = 0.7$$

$$\text{at } t_3 = 3 \text{ the score is: } s_2(3) = s_2(t_2) - [s_2(t_2) \cdot w_2^B(3)] = 0.7 - (0.7 \cdot 0) = 0.7$$

$$\text{at } t_4 = 4 \text{ the score is: } s_2(4) = s_2(t_3) - [s_2(t_3) \cdot w_2^B(4)] = 0.7 - (0.7 \cdot 1) = 0$$

$$\text{at } t_5 = 5 \text{ the score is: } s_2(5) = 0$$

$$\text{at } t_6 = 6 \text{ the score is: } s_2(6) = 0$$

$$\text{at } t_7 = 7 \text{ the score is: } s_2(7) = 0$$

**Individual  $ID = 3$ :**

$$\text{at } t_1 = 1 \text{ the score is: } s_1(1) = s_3(t_0) - [s_3(t_0) \cdot w_3^B(1)] = 1 - (1 \cdot 0) = 1$$

$$\text{at } t_2 = 2 \text{ the score is: } s_1(2) = s_3(t_1) - [s_3(t_1) \cdot w_3^B(2)] = 1 - (1 \cdot 0) = 1$$

$$\text{at } t_3 = 3 \text{ the score is: } s_1(3) = s_3(t_2) - [s_3(t_2) \cdot w_3^B(3)] = 1 - (1 \cdot 0) = 1$$

$$\text{at } t_4 = 4 \text{ the score is: } s_1(4) = s_3(t_3) - [s_3(t_3) \cdot w_3^B(4)] = 1 - (1 \cdot 0) = 1$$

$$\text{at } t_5 = 5 \text{ the score is: } s_1(5) = s_3(t_4) - [s_3(t_4) \cdot w_3^B(5)] = 1 - (1 \cdot 0.3) = 0.7$$

$$\text{at } t_6 = 6 \text{ the score is: } s_1(6) = s_3(t_5) - [s_3(t_5) \cdot w_3^B(6)] = 0.7 - (0.7 \cdot 0.3) = 0.49$$

$$\text{at } t_7 = 7 \text{ the score is: } s_1(7) = s_3(t_6) - [s_3(t_6) \cdot w_3^B(7)] = 0.49 - (0.49 \cdot 1) = 0$$

- Second step:
  - Calculate weighted survival probabilities

$$KM^B(t_k) = KM^B(t_{k-1}) \cdot \left(1 - \frac{\sum_{i=1}^n s_i(t_{k-1}) - \sum_{i=1}^n s_i(t_k)}{\sum_{i=1}^n s_i(t_{k-1})}\right)$$

$$\text{With } KM^B(t_0) = 1$$

- **In example:**

$$KM^B(t_1) = 1 \cdot \left(1 - \frac{3-2.4}{3}\right) = 0.8$$

$$KM^B(t_2) = 0.8 \cdot \left(1 - \frac{2.4-2.19}{2.4}\right) = 0.73$$

$$KM^B(t_3) = 0.73 \cdot \left(1 - \frac{2.19-2.043}{2.19}\right) = 0.681$$

$$KM^B(t_4) = 0.681 \cdot \left(1 - \frac{2.043-1}{2.043}\right) = 0.33$$

$$KM^B(t_5) = 0.33 \cdot \left(1 - \frac{1-0.7}{1}\right) = 0.23$$

$$KM^B(t_6) = 0.23 \cdot \left(1 - \frac{0.7-0.49}{0.7}\right) = 0.209$$

$$KM^B(t_7) = 0.209 \cdot \left(1 - \frac{0.49}{0.49}\right) = 0$$

### 3 Weight calculation for the weights in the Wei-Lachin approach

To gain the same weight relation in the Wei-Lachin approach as for the weights in the weighted hazards approach or Bakal's approach the following calculation have to be conducted under the assumption that  $w_D^B = 1$  and the relation is denoted by  $\frac{w_M^B}{w_D^B}$  with  $D$  as the fatal event and  $M$  as the non-fatal event:

For weighted hazards weights or Bakal's weights:

$$\frac{w_M^B}{w_D^B} = x \rightarrow w_M^B = x$$

For Wei-Lachin weights:

$$\frac{w_M^L}{w_D^L} = x \text{ and } w_M^L + w_D^L = 1$$

$$w_M^L = xw_D^L \text{ and } w_M^L = 1 - w_D^L$$

$$xw_D^L \stackrel{!}{=} 1 - w_D^L \rightarrow w_D^L = \frac{1}{1+x} \text{ and } w_M^L = 1 - \frac{1}{1+x}$$
